# Supplementary figures and images for: Direct electrochemistry and electrocatalysis with hemoglobin in water-soluble quantum dots film on glassy carbon electrode
Source: Royal Society of Chemistry journal article supplement (doi:10.1039/b501401h), 2005-01-01

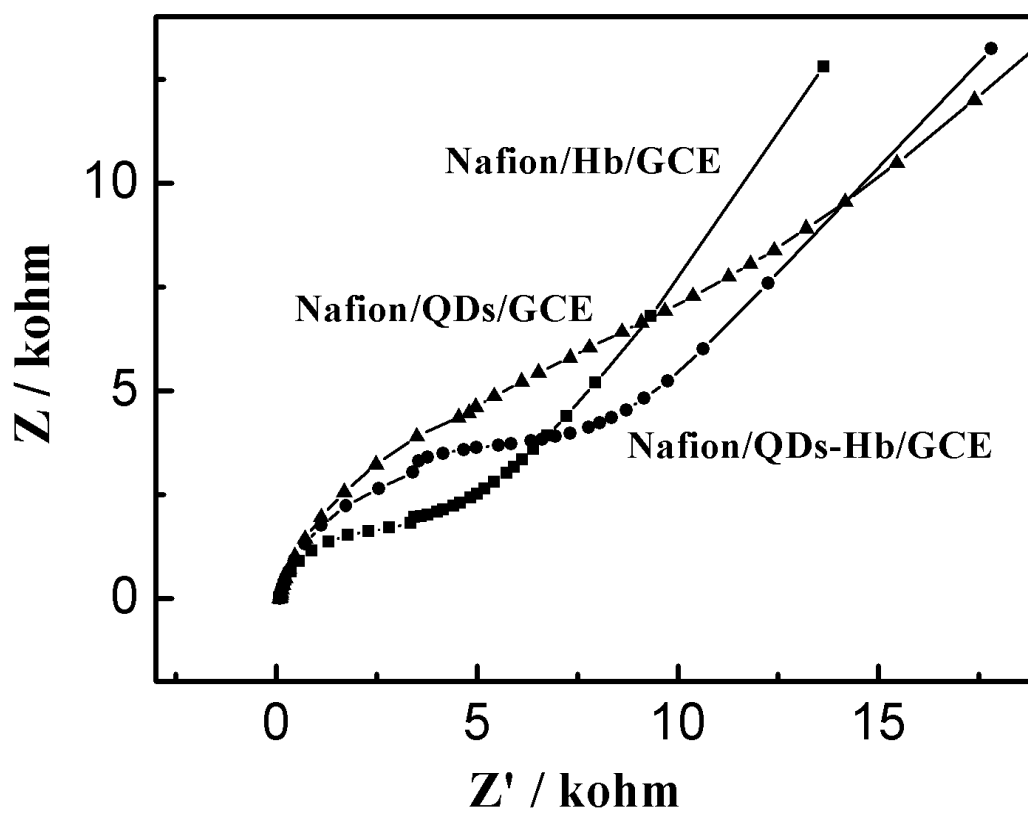

Supplement: b501401h.pdf [file b501401h.pdf]
